# Supplementary material for: Data quality and auditing within the Netherlands Heart Registration: using the PCI registry as an example
Source: Neth Heart J. 2023 Jan 16;31(9):334–9. doi: 10.1007/s12471-022-01752-1 (PMC10444924; doi:10.1007/s12471-022-01752-1)
Supplement: Supplementary file 1 — PCI Registration Committee members of the Netherlands Heart Registration [file 12471_2022_1752_MOESM1_ESM.docx]

**Addendum**

The following physicians are the members of PCI Registration Committee of the NHR. They represent the hospitals that have provided data for the PCI registry.

| | M | Scholte | Albert Schweitzer Hospital | | --- | --- | --- | | M | Meuwissen | Amphia | | JP | Henriques | Amsterdam University Medical Centre, University of Amsterdam | | KMJ | Marques | Amsterdam University Medical Centre, VU Medical Centre | | T | Teeuwen | Catharina Hospital | | H | Al Hashimi | Canisius Wilhelmina Hospital | | M | Magro | Elisabeth-TweeSteden Hospital | | J | Daemen | Erasmus Medical Centre | | BJ | Sorgdrager | Haaglanden Medical Centre | | CE | Schotborgh | Haga Hospital | | V | Roolvink | Isala | | J | Polad | Jeroen Bosch Hospital | | I | Karalis | Leiden University Medical Centre | | M | van der Ent | Maasstad Hospital | | AJW | van ‘t Hof | Maastricht University Medical Centre and Zuyderland Medical Centre | | F | Spano | Meander Medical Centre | | J | Brouwer | Medical Centre Leeuwarden | | MG | Stoel | Medical Spectrum Twente | | A | Dedic | Noordwest Hospital Group | | G | Amoroso | OLVG | | C | Camaro | Radboud University Medical Centre | | PW | Danse | Rijnstate | | JP | van Kuijk | St. Antonius Hospital | | EK | Arkenbout | Tergooi | | WT | Ruifrok | Treant Zorggroep, Scheper Hospital | | A | Kraaijeveld | University Medical Centre Utrecht | | E | Lipsic | University Medical Centre Groningen | | S | Aydin | VieCuri Medical Centre | | R | Erdem | Zorgsaam Hospital | |
| --- | --- | --- | --- | --- | --- | --- | --- | --- | --- | --- | --- | --- | --- | --- | --- | --- | --- | --- | --- | --- | --- | --- | --- | --- | --- | --- | --- | --- | --- | --- | --- | --- | --- | --- | --- | --- | --- | --- | --- | --- | --- | --- | --- | --- | --- | --- | --- | --- | --- | --- | --- | --- | --- | --- | --- | --- | --- | --- | --- | --- | --- | --- | --- | --- | --- | --- | --- | --- | --- | --- | --- | --- | --- | --- | --- | --- | --- | --- | --- | --- | --- | --- | --- | --- | --- | --- | --- |
