# Supplementary material for: Data quality and auditing within the Netherlands Heart Registration: using the PCI registry as an example
Source: Neth Heart J. 2023 Jan 16;31(9):334–9. doi: 10.1007/s12471-022-01752-1 (PMC10444924; doi:10.1007/s12471-022-01752-1)
Supplement: Supplementary file 2 — Fig. S1 … [file 12471_2022_1752_MOESM2_ESM.xlsx]

## Sheet: Factsheet PCI
	Factsheet PCI - Interventions
	Hospital XXX
	Period 2020, Q1-Q3
	Number of PCI procedures uploaded
	Table A: Total number of uploaded interventions, treated coronary arteries and patients
	Registration unit	Number
	Interventions	997
	Treated coronary arteries	1404
	Patients	910
	Tabel B: Missing values of patient characteristics
	Variable	Number missing	Total interventions	Percentage
	Serum creatinine level	61	997	0.061
	Diabetes mellitus	0	997	0
	Left ventricular ejection fraction	181	997	0.182
	Dialysis	0	997	0
	Multivessel disease	0	997	0
	Chronic total occlusion	0	997	0
	Previous myocardial infarction	0	997	0
	Indication PCI	0	997	0
	Cardiogenic shock	0	997	0
	Out of hospital cardiac arrest	0	997	0
	Previous PCI	0	997	0
	Previous CABG	0	997	0
