# Supplementary material for: Data quality and auditing within the Netherlands Heart Registration: using the PCI registry as an example
Source: Neth Heart J. 2023 Jan 16;31(9):334–9. doi: 10.1007/s12471-022-01752-1 (PMC10444924; doi:10.1007/s12471-022-01752-1)
Supplement: Supplementary file 3 — Fig. S2 … [file 12471_2022_1752_MOESM3_ESM.xlsm]

## Sheet: percentages
		Hospital A		Hospital B		Hospital C		Hospital D		Hospital E		Hospital F
		Percentages including unknown	Percentage excluding unknown	Percentages including unknown	Percentage excluding unknown	Percentages including unknown	Percentage excluding unknown	Percentages including unknown	Percentage excluding unknown	Percentages including unknown	Percentage excluding unknown	Percentages including unknown	Percentage excluding unknown
Cardiogenic shock	no cardiogenic shock	0.947244	0.96989	0.964215	0.968789	0.980028	0.987293	0.972163	0.97648	0.956374	0.958857	0.979411	0.981657
	cardiogenic shock	0.0294074	0.0301105	0.0310636	0.031211	0.0126139	0.0127074	0.0234158	0.0235197	0.0410361	0.0411427	0.0183014	0.0183434
	unknown	0.0233486	0	0.00472167	0	0.00735809	0	0.00442116	0	0.00259032	0	0.00228768	0
Chronic total occlusion	no chronic total occlusion	0.923009	0.931405	0.942222	0.946692	0.933076	0.938999	0.947929	0.952138	0.910702	0.912693	0.926222	0.926487
	chronic total occlusion	0.0679769	0.0685953	0.0530567	0.0533084	0.0606167	0.0610014	0.0476502	0.0478618	0.0871166	0.087307	0.0734916	0.0735126
	unknown	0.00901433	0	0.00472167	0	0.00630694	0	0.00442116	0	0.00218132	0	0.000285959	0
Diabetes mellitus	no diabetes mellitus	0.78602	0.808482	0.781933	0.791672	0.786382	0.792397	0.77796	0.807307	0.776278	0.777975	0.725479	0.770656
	diabetes mellitus	0.186198	0.191518	0.205765	0.208328	0.206027	0.207603	0.185689	0.192693	0.221541	0.222025	0.215899	0.229344
	unknown	0.0277819	0	0.0123012	0	0.00759168	0	0.0363517	0	0.00218132	0	0.0586217	0
Previous CABG	no previous CABG	0.887986	0.902117	0.888171	0.892385	0.86078	0.867671	0.880629	0.885267	0.910838	0.913329	0.802974	0.846548
	previous CABG	0.0963499	0.0978832	0.107107	0.107615	0.131278	0.132329	0.114131	0.114733	0.0864349	0.0866712	0.145553	0.153452
	unknown	0.0156643	0	0.00472167	0	0.00794207	0	0.00523989	0	0.00272665	0	0.0514727	0
Previous MI	no previous MI	0.716418	0.728037	0.827286	0.832042	0.809507	0.818397	0.72638	0.740568	0.813088	0.815646	0.684873	0.733762
	previous MI	0.267622	0.271963	0.166998	0.167958	0.179631	0.181603	0.254462	0.259432	0.183776	0.184354	0.248499	0.266238
	unknown	0.0159598	0	0.00571571	0	0.0108619	0	0.0191583	0	0.00313565	0	0.0666285	0
Gender	men	0.734742	0.734742	0.717197	0.717197	0.724363	0.724363	0.714917	0.714917	0.732788	0.732788	0.732914	0.732914
	women	0.265258	0.265258	0.282803	0.282803	0.275637	0.275637	0.285083	0.285083	0.267212	0.267212	0.267086	0.267086
	unknown	0	0	0	0	0	0	0	0	0	0	0	0
Indication PCI	elective	0.253731	0.256805	0.497515	0.499875	0.367204	0.369535	0.312265	0.313651	0.300341	0.305251	0.383472	0.383801
	non-STEMI	0.391311	0.396051	0.236581	0.237703	0.312777	0.314763	0.356967	0.358553	0.343286	0.348898	0.270232	0.270464
	STEMI	0.342988	0.347143	0.261183	0.262422	0.313712	0.315703	0.326347	0.327796	0.340286	0.34585	0.345439	0.345736
	unknown	0.0119699	0	0.00472167	0	0.00630694	0	0.00442116	0	0.0160873	0	0.000857878	0
Age	< 50 years	0.0860056	0.0860056	0.0805169	0.0805169	0.0749825	0.0749825	0.0738497	0.0738497	0.0927062	0.0927062	0.063483	0.063483
	50-59 years	0.203488	0.203488	0.209245	0.209245	0.196216	0.196216	0.194203	0.194203	0.204499	0.204499	0.190449	0.190449
	60-69 years	0.309147	0.309147	0.30753	0.30753	0.29117	0.29117	0.29589	0.29589	0.292979	0.292979	0.299685	0.299685
	70-79 years	0.286242	0.286242	0.285288	0.285288	0.292105	0.292105	0.307188	0.307188	0.294751	0.294751	0.293394	0.293394
	>= 80 years	0.115117	0.115117	0.11742	0.11742	0.145527	0.145527	0.128869	0.128869	0.115065	0.115065	0.152988	0.152988
	unknown	0	0	0	0	0	0	0	0	0	0	0	0
Left ventricular EF	EF > 50%	0.486955		0.662799		0.168652		0.687409		0.151891		0.296199
	EF 30-50%	0.240666		0.133199		0.0668822		0.119105		0.0578632		0.153342
	EF < 30%	0.0380117		0.0536495		0.014806		0.0595527		0.00805952		0.0611621
	unknown	0.234368		0.150353		0.74966		0.133933		0.782186		0.489297
Multivessel disease	no mutlivessel disease	0.513669	0.523652	0.627734	0.630712	0.468232	0.471259	0.477812	0.480329	0.567007	0.568402	0.521876	0.524124
	multivessel disease	0.467268	0.476348	0.367545	0.369288	0.525345	0.528741	0.516948	0.519671	0.430539	0.431598	0.473835	0.475876
	unknown	0.0190631	0	0.00472167	0	0.00642373	0	0.00523989	0	0.00245399	0	0.00428939	0
Renal insufficiency	eGFR >= 60	0.62125		0.75	0.773846	0.719808	0.738526	0.739316	0.786448	0.76319	0.798573	0.531313
	eGFR 30-59	0.163588		0.196446	0.202692	0.232189	0.238226	0.183887	0.195611	0.176551	0.184736	0.230769
	eGFR 15-29	0.0118221		0.0171471	0.0176923	0.0164681	0.0168963	0.012936	0.0137607	0.0106339	0.011127	0.0323134
	eGFR < 15	0.0036944		0.00335487	0.00346154	0.00338706	0.00347513	0.00327493	0.00348371	0.00381731	0.00399429	0.00743494
	dialysis	0.000295552		0.00223658	0.00230769	0.00280308	0.00287597	0.000654986	0.000696743	0.00149966	0.00156919	0.00200172
	unknown	0.19935		0.0308151	0	0.0253445	0	0.0599312	0	0.0443081	0	0.196168
OHCA	geen OHCA	0.934831	0.958485	0.965582	0.970162	0.946391	0.955881	0.964303	0.968586	0.95801	0.960235	0.965971	0.968741
	OHCA	0.0404906	0.0415152	0.0296968	0.0298377	0.0436814	0.0441194	0.0312756	0.0314145	0.0396728	0.039765	0.0311696	0.031259
	unknown	0.0246786	0	0.00472167	0	0.00992759	0	0.00442116	0	0.00231766	0	0.00285959	0
